# Supplementary material for: Efficacy of the Home-Based Mental Health Evaluation (HOME) Program for Engaging Patients in Care After Hospitalization
Source: Atypon-hosted journal article supplement (doi:10.1176/appi.ps.201900002), 2019-08-27

**Online Supplement - CONSORT Study Flow Diagram for HOME Program Participants**

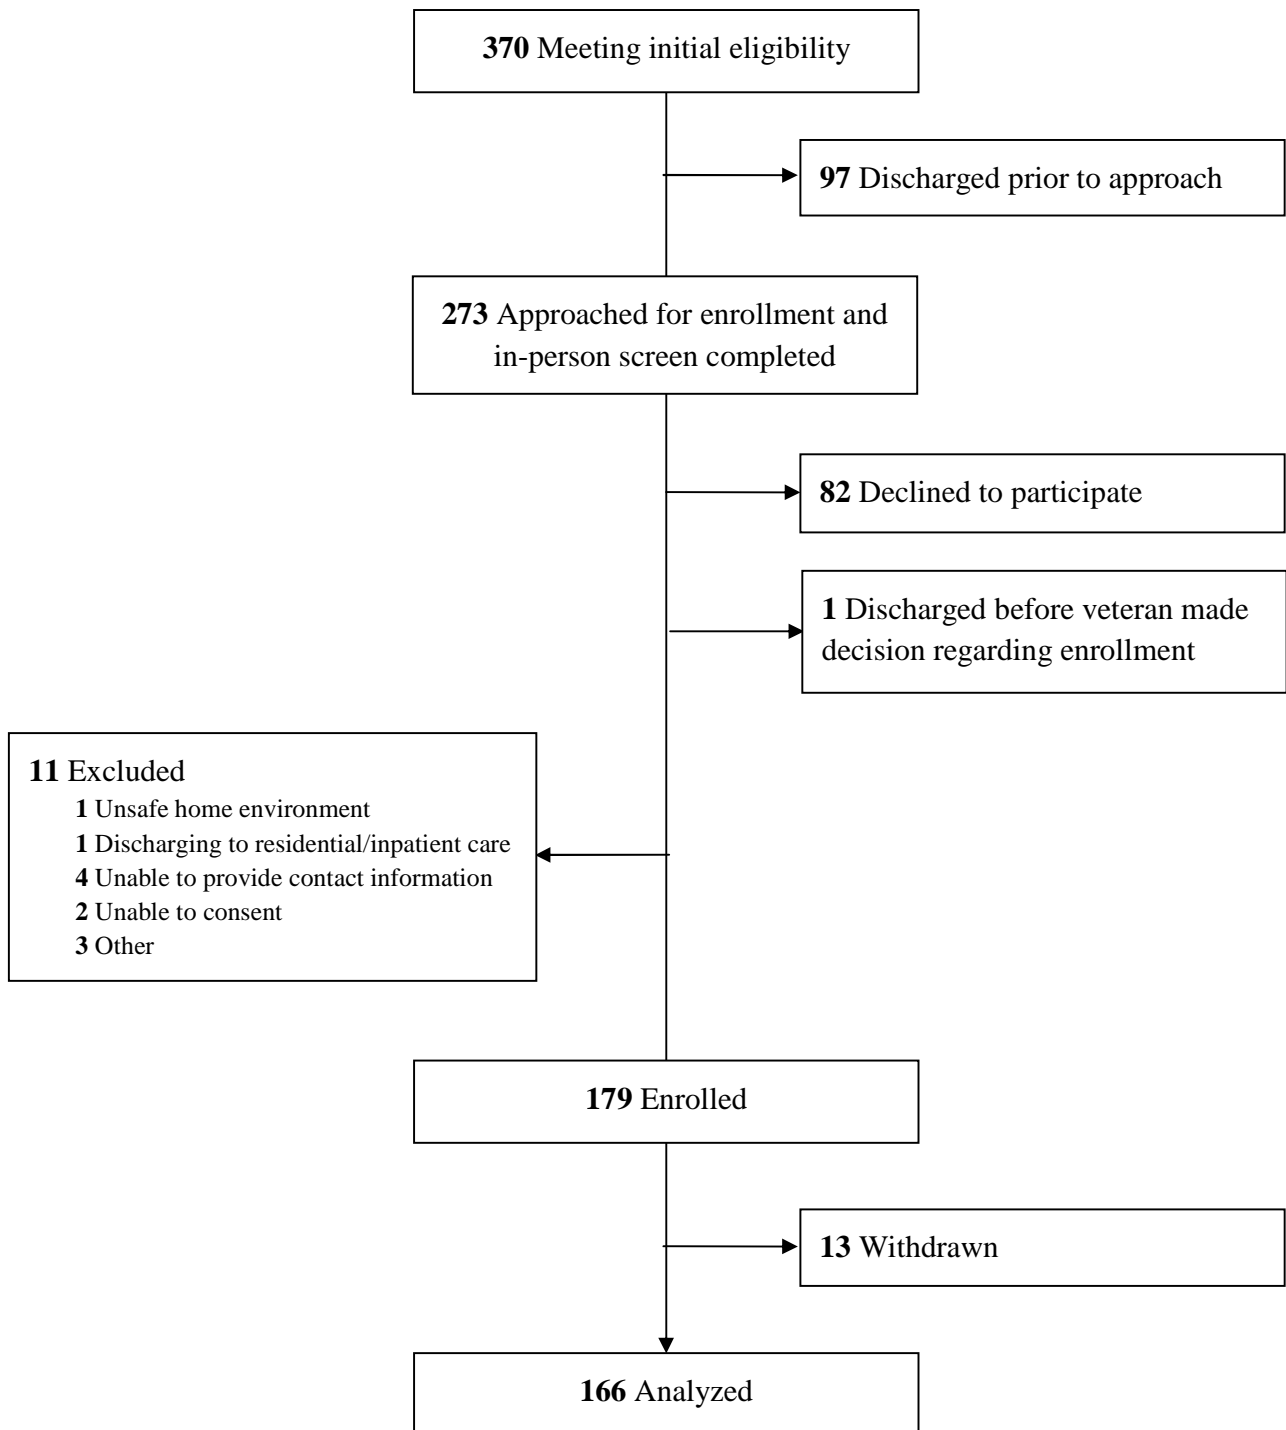

**Online Supplement - CONSORT Study Flow Diagram for E-CARE Participants**

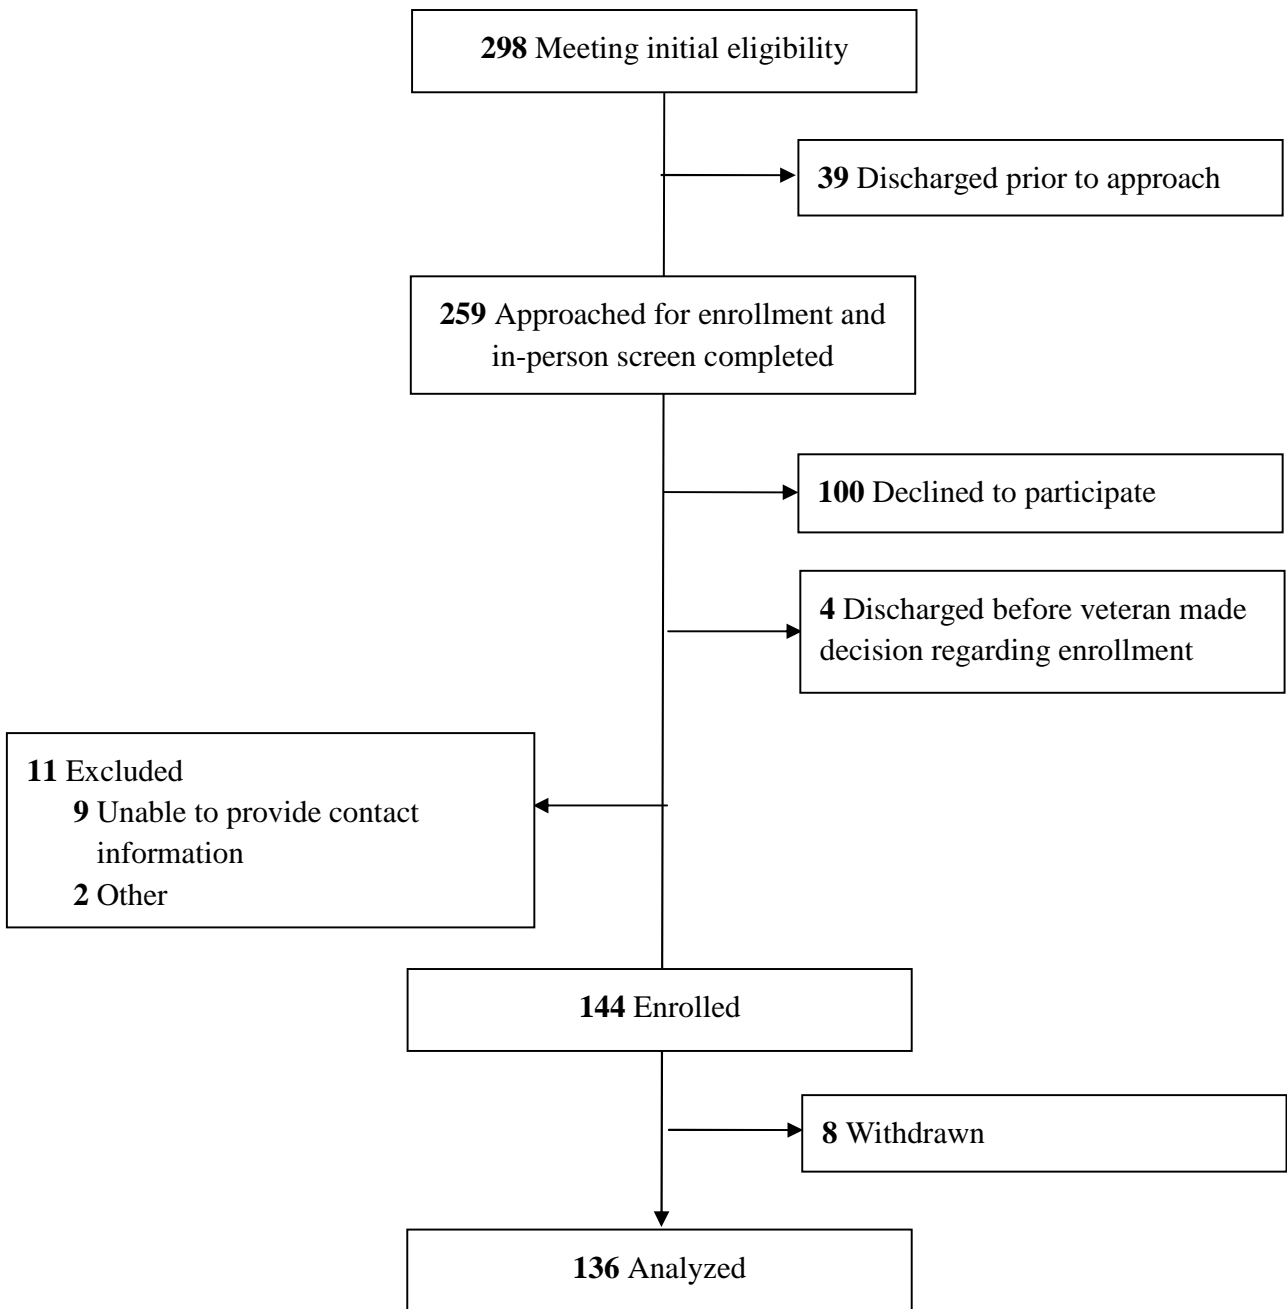

Supplement: appi.ps.201900002.ds001.pdf [file appi.ps.201900002.ds001.pdf]
